# Supplementary material for: Glycogen synthase kinase 3β represses MYOGENIN function in alveolar rhabdomyosarcoma
Source: PubMed Central journal article supplement — Cell Death Dis. 2014 Feb 27;5(2):e1094–. doi: 10.1038/cddis.2014.58 (PMC3944270; doi:10.1038/cddis.2014.58), 2014-02-27
Supplement: cddis201458x1.pdf [file cddis201458x1.pdf]

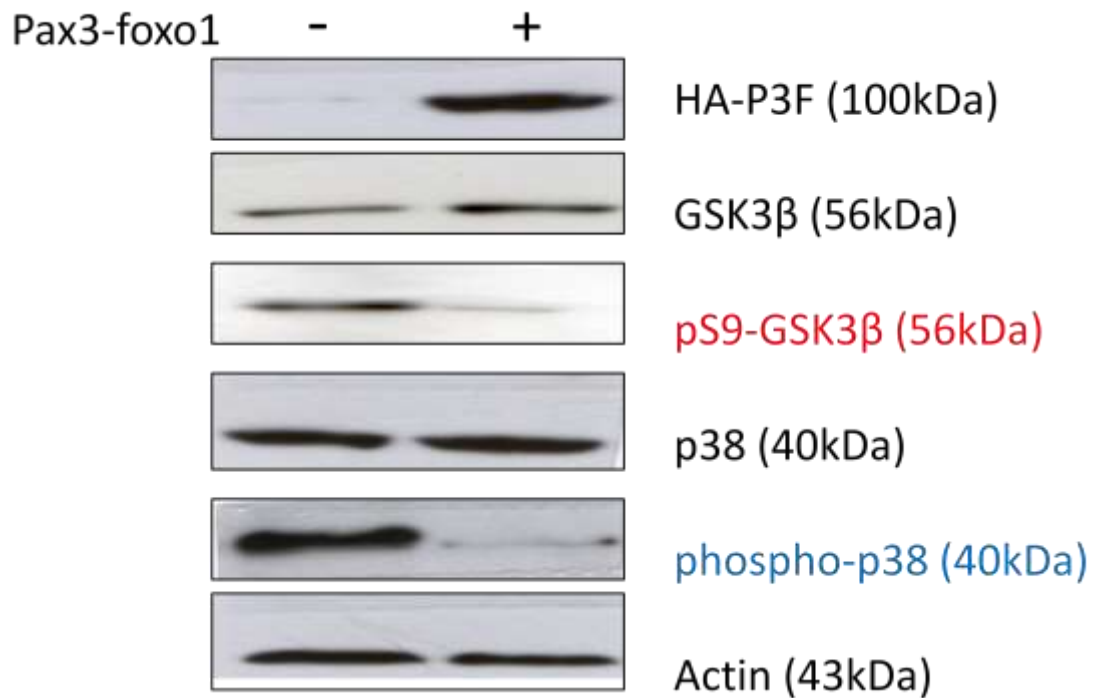

Supplementary Figure 1: C2C12 myoblasts were transfected with either HA-Pax3-foxo1 or pcDNA3.1 control plasmid for 1 day before extraction. Overexpression of HA-Pax3-foxo1 resulted in decreased phosphorylation of GSK3β at serine 9 indicating its activation which also corresponded with decreased phosphorylation and hence activation of p38 at T180/Y182.
